# Supplementary material for: A Novel HAGE/WT1-ImmunoBody® Vaccine Combination Enhances Anti-Tumour Responses When Compared to Either Vaccine Alone
Source: Frontiers journal article supplement (doi:10.3389/fonc.2021.636977), 2021-06-28
Supplement: Image_1.pdf [file Image_1.pdf]

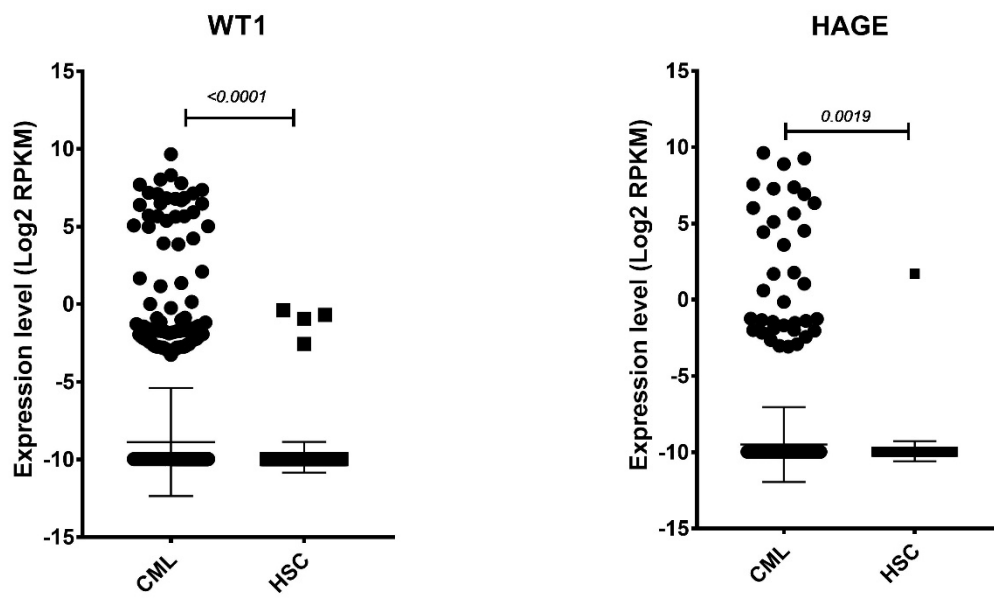

Suppl. Figure 1
